# Supplementary material for: Pt12H24 −: A Cuboctahedral Platinum Hydride Cluster Cage
Source: PubMed Central journal article supplement (PMC11614364; doi:10.1002/cphc.202400649), 2024-10-28
Supplement: CPHC-25-e202400649-s001.pdf [file CPHC-25-e202400649-s001.pdf]

# ChemPhysChem

Supporting Information

## **Pt<sub>12</sub>H<sub>24</sub><sup>-</sup>: A Cuboctahedral Platinum Hydride Cluster Cage**

Siddhi Gojare, Dennis Bumüller, Stephan Kohaut, Manuel Kraft, Ulrich Heiz,  
Manfred M. Kappes, Karin Fink, and Detlef Schooss\*

Supporting Information:

$\text{Pt}_{12}\text{H}_{24}^-$ : a Cuboctahedral Platinum Hydride  
Cluster Cage

Siddhi Gojare,<sup>†</sup> Dennis Bumüller,<sup>†</sup> Stephan Kohaut,<sup>†</sup> Manuel Kraft,<sup>†</sup> Ulrich Heiz,<sup>‡</sup>  
Manfred M. Kappes,<sup>¶,†</sup> Karin Fink,<sup>†</sup> and Detlef Schooss\*,<sup>†</sup>

<sup>†</sup>*Institute of Nanotechnology, Karlsruhe Institute of Technology (KIT), Kaiserstraße 12,  
76131, Germany*

<sup>‡</sup>*Chair of Physical Chemistry and Catalysis Research Center, Department of Chemistry,  
School of Natural Sciences, Technical University of Munich, 85748 Garching, Germany*

<sup>¶</sup>*Institute of Physical Chemistry, Karlsruhe Institute of Technology (KIT), Kaiserstraße  
12, 76131, Germany*

E-mail: detlef.schooss@kit.edu

# Contents

|          |                                            |             |
|----------|--------------------------------------------|-------------|
| <b>1</b> | <b>Methods</b>                             | <b>S-2</b>  |
| 1.1      | Trapped Ion Electron Diffraction . . . . . | S-2         |
| 1.2      | Mass spectrum Platinum Hydrides . . . . .  | S-4         |
| 1.3      | Density functional computations . . . . .  | S-4         |
| <b>2</b> | <b>Properties of different isomers</b>     | <b>S-6</b>  |
| <b>3</b> | <b>Cartesian coordinates of isomers</b>    | <b>S-16</b> |
|          | <b>References</b>                          | <b>S-40</b> |

## 1 Methods

### 1.1 Trapped Ion Electron Diffraction

Bare platinum clusters were generated in a temperature controlled ( $\approx 90$  K) magnetron sputter source. Hydrides were produced by mixing deuterium (0.3 vol%) into the sputter gas (He and Ar) at a total pressure of 500 Pa. The mass distribution of the cluster ions was analyzed by a time-of-flight spectrometer with a mass resolution of  $m/\Delta m \approx 200$  (see Fig.S1). Cluster anions were isolated to a single Pt core size by a quadrupole mass filter, captured in a cooled ( $95 \pm 5$  K) quadrupole ion trap and thermalized by collisions with about 1 Pa He for several seconds. A 40 keV electron beam crossed the ion cloud consisting of ca.  $10^5$  to  $10^6$  clusters. Electrons scattered during exposure periods of 20–30 s were detected on a phosphor screen assembly and integrated on an external charge-coupled device (CCD) camera.

The total scattering function  $I_{\text{tot}}(s)$  as function of the electron momentum transfer  $s$  was extracted by radially averaging the sum of several hundred background corrected diffraction pictures. After taking the atomic scattering intensity  $I_{\text{at}}^{\text{S1}}$  and an additional unspecific

polynomial based background  $I_{\text{back}}$  into account, the experimental reduced molecular scattering function  $sM^{\text{exp}}(s) = s(I_{\text{tot}} - I_{\text{at}} - I_{\text{back}})/I_{\text{at}}$  was calculated. In order to compare these results with candidate structures, the theoretical reduced molecular scattering function was approximated by

$$sM^{\text{theo}}(s) = S_c \sum_i^N \sum_{j \neq i}^N \exp\left(-\frac{l_{ij}^2}{2}s^2\right) |f_i(s)||f_j(s)| \cos(\eta_i - \eta_j) \frac{\sin(sk_s r_{ij})}{k_s r_{ij}}, \quad (1)$$

where  $N$  is the number of atoms in the cluster,  $S_c$  and  $k_s$  are scaling factors for the amplitudes and distances,  $\eta_i$  and  $f_i$  are the phase and scattering amplitude of the elastic scattering factors.<sup>S1</sup>  $r_{ij}$  is the inter atomic distance and  $l_{ij}$  the mean vibrational amplitude. For the latter, a single (averaged) value for every atom-pair type (Pt-Pt, Pt-D or D-D) has been used. Please note that the scattering amplitude of platinum is about 20 times larger than the one of deuterium.<sup>S2</sup> Consequently, the scattering function is largely dominated by the Pt core and variations of the deuterium coverage can be only observed indirectly by changes induced in the platinum core structure.

Experimental broadening was considered by a convolution of  $sM^{\text{theo}}$  with a Gaussian ( $\sigma = 0.15 \text{ \AA}^{-1}$ ), beam attenuation by the finite trap opening was taken into account by weighting of  $sM^{\text{theo}}$  with an error function centered at the maximum scattering angle ( $s = 14 \text{ \AA}^{-1}$ ). For comparison of theoretical and experimental data, a  $\chi^2$ -fit was performed minimizing the weighted differences by variation of  $S_c$ ,  $k_s$ ,  $l_{\text{Pt-Pt}}$ ,  $l_{\text{Pt-D}}$ ,  $l_{\text{D-D}}$  and the parameters of  $I_{\text{back}}$ . The level of agreement between the experiment and model structure was determined by a weighted profile factor<sup>S3</sup> given by

$$R_w = \sqrt{\frac{\sum_k w_k (sM_k^{\text{theo}} - sM_k^{\text{exp}})^2}{\sum_k w_k (sM_k^{\text{exp}})^2}}. \quad (2)$$

The weighting factors  $w_k$  were calculated from the error propagated standard deviation of the experimental data.

## 1.2 Mass spectrum Platinum Hydrides

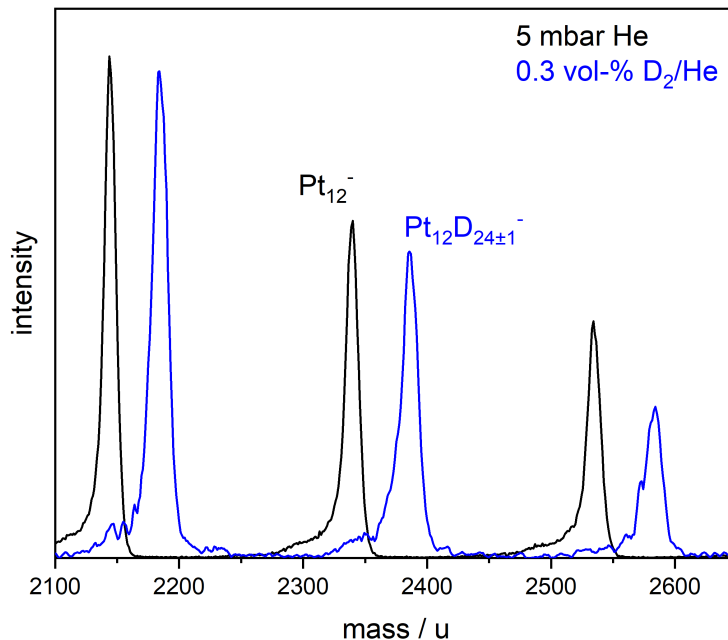

Figure S1: Typical mass spectrum of bare and deuterated Pt-cluster anions around  $\text{Pt}_{12}^-$ . The mean value and width of the number of deuterium atoms was obtained by fitting an empirical asymmetric peak function (Gram-Charlier) to the mass spectral profiles for the bare and D-loaded mass peaks. The formal mean stoichiometry determined in this way was  $\text{Pt}_{12}\text{D}_{23.7}$  with a FWHM of 1.6 D.

## 1.3 Density functional computations

The best fitting geometries to the experimental molecular scattering data have been re-optimized using density functional theory (DFT) computations within the TURBOMOLE package (version 7.7).<sup>S4,S5</sup> The RI-J (resolution of identity for the Coulomb term J) approximation was used.<sup>S6,S7</sup> In the first step, the cluster geometries were re-optimized using the BP86<sup>S8,S9</sup> in combination with the def2-SVP basis set and the TPSS<sup>S10</sup> functional in combination with the def2-TZVP basis set (TPSS/def2-TZVP).<sup>S11</sup> For Pt, 60 core electrons were replaced by a scalar relativistic effective core potential.<sup>S12</sup> All geometry optimizations were

performed without any symmetry constraints. Fermi smearing was used to enable fractional occupations to eventually get electronic states without any holes. The initial temperature was fixed to T=300K and was self-consistently lowered to T=10K. Vibrational frequencies of all cluster structures were analyzed to verify that the final structures are local minima. Different spin multiplicities were checked. For charged clusters a doublet spin state and for neutral clusters a singlet spin state was found to be the most stable one in all cases.

For the heavy elements such as Pt, the effect of spin-orbit coupling (SOC) needs to be taken into account to obtain an accurate ground state structure.<sup>S13,S14</sup> The previous study on bare  $\text{Pt}_n^-$  clusters showed that SOC contribution had a significant influence on the relative energies and the geometry of the isomers.<sup>S15</sup> Therefore, the final geometries were re-optimized using a relativistic two-component method<sup>S16</sup> with the TPSS functional in combination with the dhf-TZVP-2c basis set (2C-TPSS/dhf-TZVP-2c).

The effect of dispersion correction was evaluated using DFT-D4.<sup>S17</sup> All relative energies were corrected by the zero-point energies. Free energy computations were carried out considering an experimental temperature of 120K and pressure of 0.44 mbar. The computation of the activation barriers and corresponding transition states for the isomer transformation were carried out using the Nudged Elastic Band (NEB) method.<sup>S18</sup> The d-band center of all the isomers were calculated using Mulliken population of the d-orbitals  $n(\epsilon)$  using

$$\epsilon_d = \frac{\sum_{\alpha} \sum_{\epsilon} \epsilon n(\epsilon)}{\sum_{\alpha} \sum_{\epsilon} n(\epsilon)}, \quad (3)$$

where  $\epsilon$  is the molecular orbital energy and  $\alpha$  goes over the selected surface Pt atoms only. A natural population analysis<sup>S19</sup> and the Wiberg bond indices<sup>S20</sup> were computed to predict the charge distribution and the nature of the chemical bonds. To test for spherical aromaticity, the Nucleus Independent Chemical Shift (NICS) value was calculated.<sup>S21</sup> In the density of states plots, the energy of the highest occupied orbital was chosen as Fermi level. The orbital energies were broadened by Gaussians (0.272 eV FWHM).

## 2 Properties of different isomers

**Table S1:** Relative electronic energies  $E$  (TPSS/def2-TZVP) and profile factors  $R_w$  of the isomers for different deuterium distributions generated using isomer 1 core.

| isomer   | $E/\text{eV}$ | $R_w$ % |
|----------|---------------|---------|
| <b>1</b> | 0             | 5.5     |
| 1-1      | 1.14          | 4.8     |
| 1-2      | 1.35          | 4.5     |
| 1-3      | 1.40          | 5.4     |

**Table S2:** Relative electronic energies  $E$  (TPSS/def2-TZVP) and profile factors  $R_w$  for different deuterium distributions generated using isomer 2 core.

| isomer   | $E/\text{eV}$ | $R_w/\%$ |
|----------|---------------|----------|
| <b>2</b> | 0             | 12       |
| 2-1      | 0.40          | 12       |
| 2-2      | 0.46          | 11       |
| 2-3      | 0.54          | 12       |
| 2-4      | 0.55          | 10       |
| 2-5      | 0.60          | 13       |
| 2-6      | 0.60          | 11       |
| 2-7      | 0.74          | 13       |
| 2-8      | 0.77          | 14       |
| 2-9      | 0.82          | 11       |

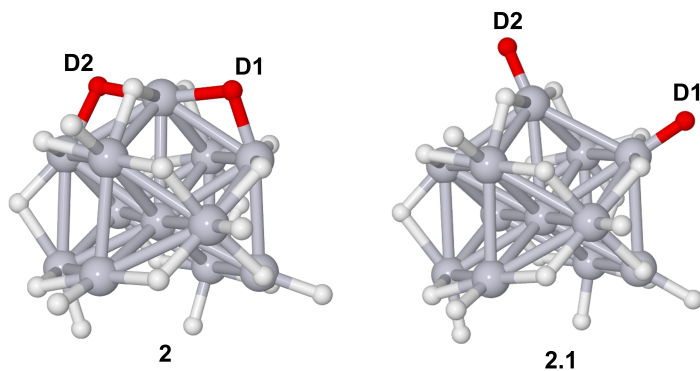

Figure S2: Isomer **2** core structure with different distributions of deuterium atoms. The isomer on the left-hand side is the most stable one.

Table S3: Comparison of relative energy  $E$  (TPSS/def2-TZVP) for different charge states of the isomers 1-3. All values are zero point energy corrected (values in the bracket denote the relative contribution of ZPE).

| isomer | $E/\text{eV Pt}_{12}\text{D}_{24}^-$ | $E/\text{eV Pt}_{12}\text{D}_{24}$ | $E/\text{eV Pt}_{12}\text{D}_{24}^+$ | $E/\text{eV Pt}_{12}\text{D}_{24}^{2-}$ |
|--------|--------------------------------------|------------------------------------|--------------------------------------|-----------------------------------------|
| 1      | 0                                    | 0                                  | 0.44 (-0.005)                        | 0                                       |
| 2      | 0.72 (-0.052)                        | 0.31 (0.03)                        | 0                                    | 1.2 (-0.144)                            |
| 3      | 0.99 (-0.072)                        | 1.05 (-0.08)                       | 1.41 (-0.118)                        | 0.94 (-0.063)                           |

Table S4: Comparison of the relative energies of isomers 1-3 for TPSS/def2-TZVP, 2C-TPSS/dhf-TZVP-2c, the dispersion corrections, and relative of the relative difference of zero point energy and free Gibbs energy ( $G$ ). The contribution of the relative zero point energy is given in parenthesis.

| isomer | TPSS/def2-TZVP | 2C-TPSS/dhf-TZVP-2c | disp. corr./eV (2C) | $G/\text{eV}$ (2C) |
|--------|----------------|---------------------|---------------------|--------------------|
| 1      | 0              | 0                   | -5.03               | 0                  |
| 2      | 0.72 (-0.052)  | 0.52 (-0.053)       | -5.05               | 0.003              |
| 3      | 0.99 (-0.071)  | 0.96 (-0.018)       | -5.00               | -0.006             |



**Table S5:** Calculated adsorption energies (electronic energies) of differently bound deuterium atoms of isomer 2 ( $\text{Pt}_{12}\text{D}_{24}^- \rightarrow \text{Pt}_{12}\text{D}_{23}^- + \frac{1}{2}\text{D}_2$ ) at TPSS/def2-TZVP level of theory. For positions, see Fig. S9.

| bridge $\text{D}_x$ atom | adsorption energy (eV) | on-top $\text{D}_x$ atom | adsorption energy (eV) |
|--------------------------|------------------------|--------------------------|------------------------|
| 1                        | 1.22                   | 19                       | 0.55                   |
| 2                        | 1.19                   | 20                       | 0.47                   |
| 3                        | 1.14                   | 21                       | 0.43                   |
| 4                        | 1.07                   | 22                       | 0.42                   |
| 5                        | 0.98                   | 23                       | 0.26                   |
| 6                        | 0.92                   | 24                       | 0.23                   |
| 7                        | 0.91                   |                          |                        |
| 8                        | 0.8                    |                          |                        |
| 9                        | 0.79                   |                          |                        |
| 10                       | 0.72                   |                          |                        |
| 11                       | 0.71                   |                          |                        |
| 12                       | 0.7                    |                          |                        |
| 13                       | 0.64                   |                          |                        |
| 14                       | 0.61                   |                          |                        |
| 15                       | 0.47                   |                          |                        |
| 16                       | 0.38                   |                          |                        |
| 17                       | 0.37                   |                          |                        |
| 18                       | 0.33                   |                          |                        |

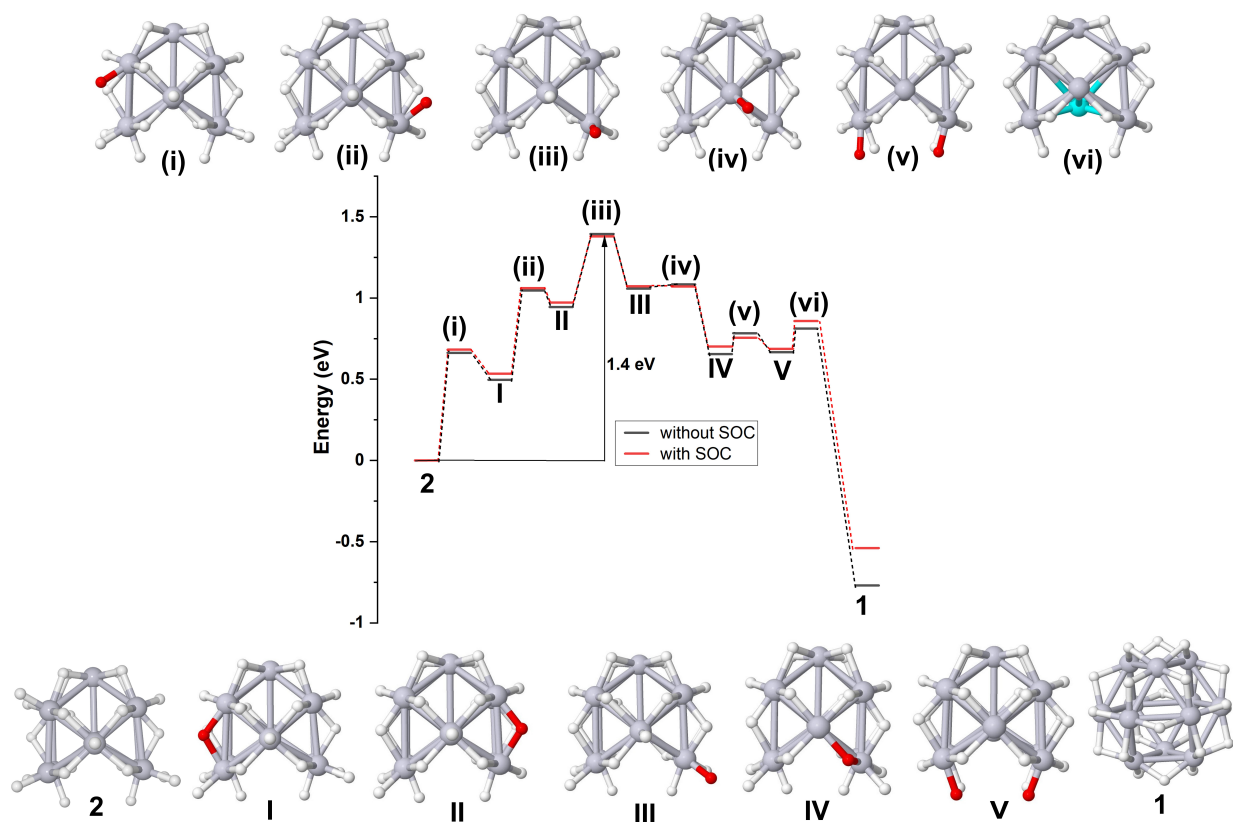

Figure S3: A reaction pathway describing the conversion of isomer **2** to **1** with and without the inclusion of spin-orbit coupling effect. The deuterium atoms in red color denote the ones whose position are changed. Note that electronic energies are given relative to isomer **2**.

Table S6: Calculated charges using natural population analysis of bare  $\text{Pt}_{12}^-$ . For positions, see Figure S8

| number | atom | charge |
|--------|------|--------|
| 1      | Pt   | -0.197 |
| 2      | Pt   | -0.197 |
| 3      | Pt   | -0.197 |
| 4      | Pt   | -0.065 |
| 5      | Pt   | -0.065 |
| 6      | Pt   | -0.065 |
| 7      | Pt   | -0.065 |
| 8      | Pt   | -0.065 |
| 9      | Pt   | -0.065 |
| 10     | Pt   | -0.008 |
| 11     | Pt   | -0.008 |
| 12     | Pt   | -0.008 |

**Table S7: Mean bond lengths (TPSS/def2-TZVP) and mean coordination number CN of the platinum core**

| isomer   | $d_{\text{Pt-Pt}}/\text{pm}$ | $d_{\text{Pt-D}}/\text{pm}$ |        | CN   |
|----------|------------------------------|-----------------------------|--------|------|
|          |                              | bridge                      | on-top |      |
| <b>1</b> | 0.271                        | 0.176                       | –      | 4.0  |
| <b>2</b> | 0.277                        | 0.176                       | 0.158  | 5.16 |
| <b>3</b> | 0.272                        | 0.176                       | –      | 4.0  |
| <b>4</b> | 0.268                        | -                           | -      | 5.5  |

**Table S8: Calculated charges using natural population analysis of isomer 2. For positions, see Figure S9.**

| number | atom | charge | D site |
|--------|------|--------|--------|
| 1      | D    | -0.104 | bridge |
| 2      | D    | -0.092 | bridge |
| 3      | D    | -0.107 | bridge |
| 4      | D    | -0.111 | bridge |
| 5      | D    | -0.1   | bridge |
| 6      | D    | -0.081 | bridge |
| 7      | D    | -0.068 | bridge |
| 8      | D    | -0.108 | bridge |
| 9      | D    | -0.077 | bridge |
| 10     | D    | -0.043 | bridge |
| 11     | D    | -0.116 | bridge |
| 12     | D    | -0.076 | bridge |
| 13     | D    | -0.105 | bridge |
| 14     | D    | -0.113 | bridge |
| 15     | D    | -0.103 | bridge |
| 16     | D    | -0.069 | bridge |
| 17     | D    | -0.127 | bridge |
| 18     | D    | -0.115 | bridge |
| 19     | D    | -0.042 | on-top |
| 20     | D    | -0.04  | on-top |
| 21     | D    | -0.048 | on-top |
| 22     | D    | -0.032 | on-top |
| 23     | D    | -0.068 | on-top |
| 24     | D    | -0.044 | on-top |
| 25     | Pt   | -0.388 |        |
| 26     | Pt   | 0.094  |        |
| 27     | Pt   | 0.043  |        |
| 28     | Pt   | 0.131  |        |
| 29     | Pt   | 0.155  |        |
| 30     | Pt   | 0.209  |        |
| 31     | Pt   | 0.089  |        |
| 32     | Pt   | 0.122  |        |
| 33     | Pt   | 0.156  |        |
| 34     | Pt   | 0.217  |        |
| 35     | Pt   | 0.081  |        |
| 36     | Pt   | 0.078  |        |

**Table S9: Calculated charges using natural population analysis of isomer 1. All other charges are similar to the ones given in the table**

| Number | Atoms | Charge   |
|--------|-------|----------|
| 1      | Pt    | 0.12641  |
| 3      | D     | -0.10533 |

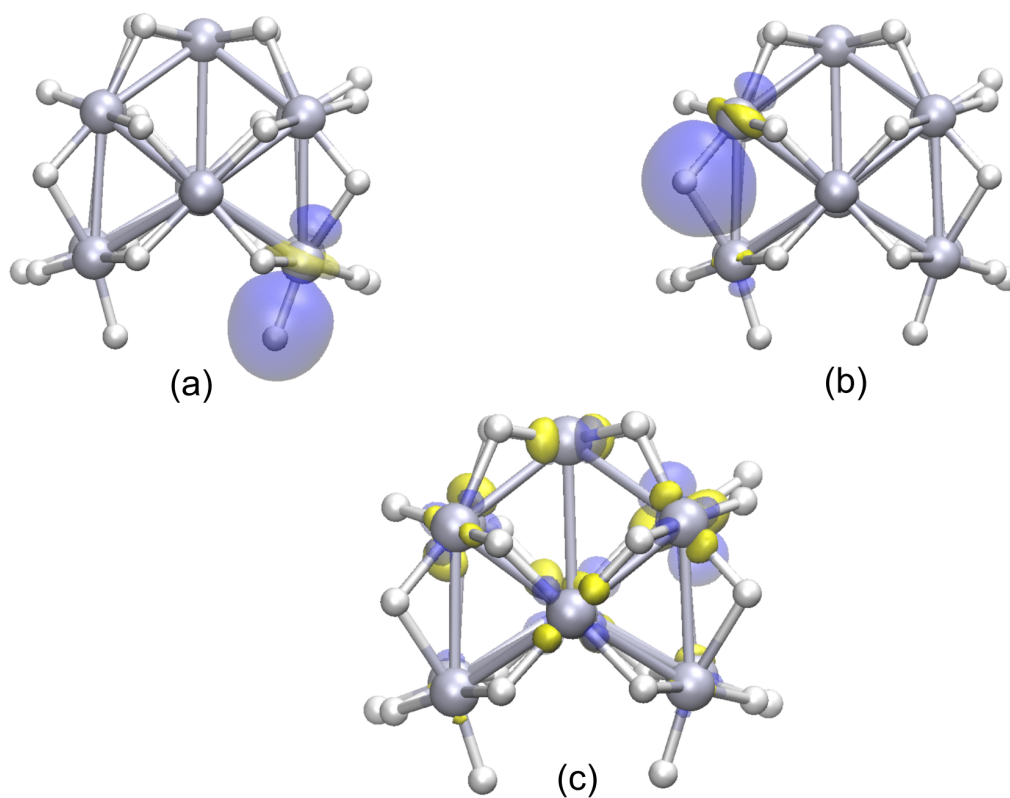

Figure S4: Localized orbitals of isomer **2** obtained by Boys localization. (a) a typical 2-center - 2 electron bond between Pt-D, and (b) a 3-center - 2 electron bond Pt-D-Pt bond. (c) typical d-orbitals at different Pt atoms.

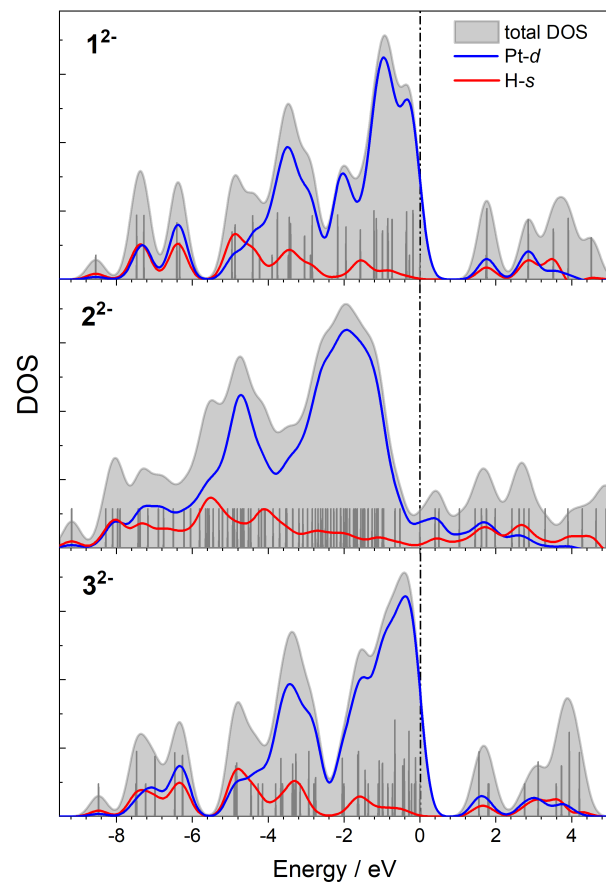

Figure S5: DOS for the dianions  $\text{Pt}_{12}\text{D}_{24}^{2-}$  of isomer **1-3**.

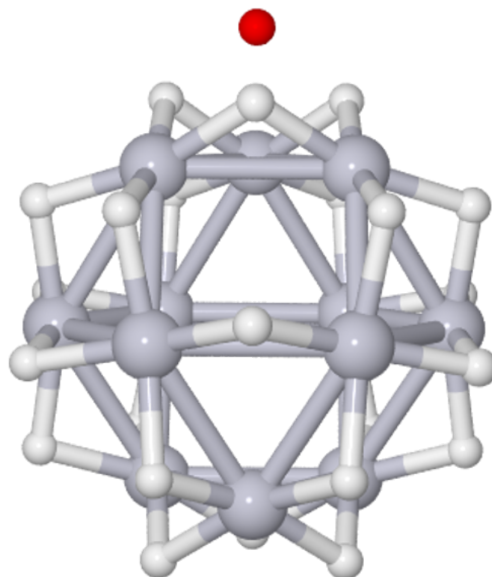

Figure S6: Isomer **1** with the position of the pseudo atom in red at which the NICS value was calculated.

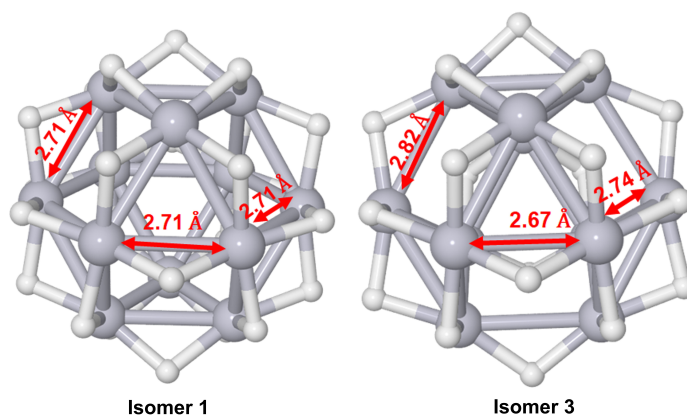

Figure S7: Pt-Pt bond lengths in isomer **1** and **3**.

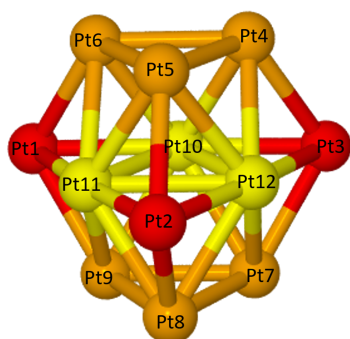

Figure S8: Structure and charge distribution of  $\text{Pt}_{12}^-$  (red - high, orange - medium, yellow - low charge.)

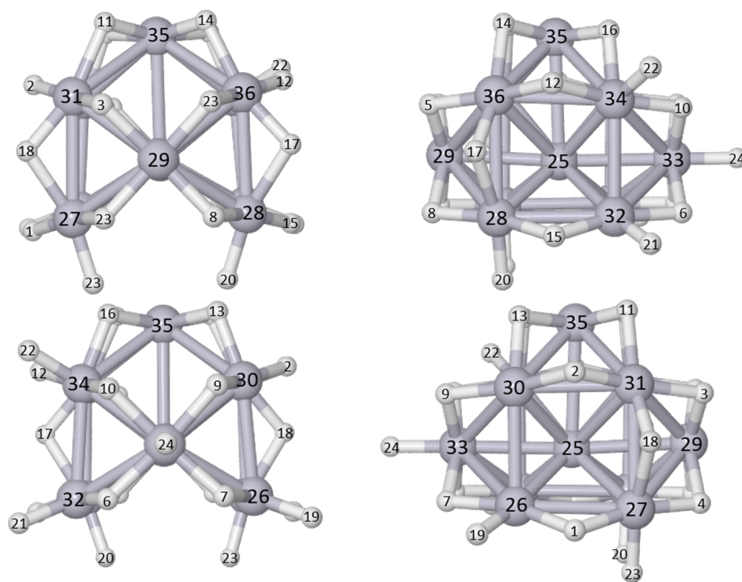

Figure S9: Different views of isomer **2**.



### 3 Cartesian coordinates of isomers

energies are given in Hartree

Isomer 1:(method: TPSS/dhf-TZVP-2c)

Energy= -1450.40223

|    |            |            |            |
|----|------------|------------|------------|
| Pt | 1.4457026  | -1.6268444 | 1.6188080  |
| Pt | -1.2519436 | -1.5028786 | 1.8809997  |
| H  | -2.8427640 | -0.7566915 | 1.7790444  |
| H  | -1.7629828 | -2.8280782 | 0.8416202  |
| H  | 1.5357436  | -0.5655225 | 3.0202580  |
| Pt | 0.2827237  | 0.6061906  | 2.6301386  |
| H  | -0.9717175 | -0.4521343 | 3.2662800  |
| H  | 3.0497111  | -1.0252534 | 1.2092673  |
| Pt | 2.6982888  | -0.1242100 | -0.2609531 |
| H  | 3.1044505  | 1.3179714  | 0.6629431  |
| Pt | 1.5342947  | 2.1084421  | 0.7488053  |
| H  | 1.5917095  | 1.7729459  | 2.4759141  |
| Pt | -2.6981044 | 0.1246199  | 0.2610342  |
| H  | -3.0502081 | 1.0271342  | -1.2084527 |
| H  | -2.7860187 | 1.5875960  | 1.2356043  |
| H  | -0.9187270 | 1.8914469  | 2.7200500  |
| Pt | -1.1635489 | 2.2336381  | 1.0106690  |
| H  | 0.2450759  | 3.2868019  | 0.9727016  |
| Pt | 1.1636928  | -2.2334586 | -1.0102329 |
| H  | 1.6199605  | -2.9850740 | 0.5139799  |
| H  | -0.2450735 | -3.2869258 | -0.9716434 |
| H  | 2.7861017  | -1.5880662 | -1.2349754 |

|    |            |            |            |
|----|------------|------------|------------|
| H  | 1.7616569  | 2.8283448  | -0.8413966 |
| Pt | -1.5340843 | -2.1084862 | -0.7488924 |
| H  | -3.1036955 | -1.3169252 | -0.6645741 |
| H  | -1.5901179 | -1.7747247 | -2.4764226 |
| H  | 0.1088992  | -2.5275353 | 2.3232949  |
| Pt | -0.2826002 | -0.6063777 | -2.6302109 |
| H  | 2.8425037  | 0.7556538  | -1.7793444 |
| H  | 0.9711288  | 0.4529319  | -3.2669583 |
| H  | 0.9195033  | -1.8903099 | -2.7200789 |
| H  | -1.6191581 | 2.9851424  | -0.5142102 |
| Pt | -1.4460699 | 1.6267587  | -1.6186213 |
| Pt | 1.2516660  | 1.5026585  | -1.8813807 |
| H  | -0.1087066 | 2.5269074  | -2.3241374 |
| H  | -1.5372922 | 0.5643124  | -3.0189273 |

Isomer 2:(method: TPSS/dhf-TZVP-2c)

Energy= -1450.37504

|    |            |            |            |
|----|------------|------------|------------|
| Pt | 0.1878900  | -0.1302391 | 0.2939932  |
| Pt | -1.3057896 | -1.1240102 | 2.3270471  |
| H  | -2.3369556 | -1.5798069 | 3.4355527  |
| H  | -1.9043019 | -2.5123395 | 1.4436460  |
| H  | 1.4400655  | -0.1908425 | 3.5357113  |
| Pt | 0.4648153  | 0.8764716  | 2.8881617  |
| H  | -0.8533135 | -0.0325480 | 3.6201409  |
| H  | 3.2233122  | -1.2217924 | 1.2182411  |
| Pt | 2.8684889  | -0.4138737 | -0.0908050 |
| H  | 3.3428474  | 1.0173946  | 0.7747356  |

|    |            |            |            |
|----|------------|------------|------------|
| Pt | 1.8611827  | 2.0301707  | 0.7798269  |
| H  | 1.8920153  | 1.8146136  | 2.5644065  |
| Pt | -2.5046925 | 0.3672855  | 0.4269250  |
| H  | -2.8906653 | 1.2131471  | -1.0263960 |
| H  | -2.4965224 | 1.9689278  | 1.2630372  |
| H  | -0.7002521 | 2.3476455  | 2.6437232  |
| Pt | -0.8752450 | 2.4785020  | 0.9941670  |
| H  | 0.6834551  | 3.3228582  | 0.9104118  |
| Pt | 1.1657775  | -2.4533583 | -0.7014852 |
| H  | -0.3236836 | -3.3644834 | -0.4551471 |
| H  | 1.6869267  | -3.7409407 | -1.4581241 |
| H  | 2.8178787  | -1.9683787 | -0.9510306 |
| H  | 2.1370526  | 2.5659080  | -0.8664296 |
| Pt | -1.5729108 | -2.1448321 | -0.2523640 |
| H  | -2.6040842 | -3.3176134 | -0.5568416 |
| H  | -1.5468535 | -1.9234848 | -2.0267675 |
| H  | -3.0423478 | -1.1301716 | -0.2610594 |
| Pt | -0.2479293 | -0.8324162 | -2.3235960 |
| H  | 2.9651443  | 0.4950542  | -1.7846782 |
| H  | 1.1103668  | 0.0959147  | -3.0822866 |
| H  | -0.3788964 | -1.3593395 | -3.8140314 |
| H  | -1.3117967 | 3.1198103  | -0.6908970 |
| Pt | -1.2199877 | 1.6834966  | -1.6088138 |
| Pt | 1.4916667  | 1.2590885  | -1.8732867 |
| H  | 0.0991159  | 2.3760996  | -2.4179602 |
| H  | -1.3217737 | 0.4080824  | -2.8777273 |

Isomer 3:(method: TPSS/dhf-TZVP-2c)

Energy= -1450.36637

|    |            |            |            |
|----|------------|------------|------------|
| H  | 2.9429853  | 1.6992574  | 0.0000000  |
| H  | 1.2465619  | 0.7189822  | 3.1647010  |
| H  | 1.2465619  | 0.7189822  | -3.1647010 |
| H  | -1.3586149 | 2.5894866  | -1.7414320 |
| H  | 1.3586149  | 2.5894866  | -1.7414320 |
| Pt | 0.0000000  | 1.5428294  | -2.2442096 |
| H  | -2.9203993 | -0.1143362 | -1.7413555 |
| H  | 1.3586149  | 2.5894866  | 1.7414320  |
| Pt | 1.3202525  | 2.3893205  | 0.0000000  |
| H  | 0.0000000  | 3.5419377  | 0.0000000  |
| Pt | -1.3202525 | 2.3893205  | 0.0000000  |
| Pt | 0.0000000  | 1.5428294  | 2.2442096  |
| H  | -1.3586149 | 2.5894866  | 1.7414320  |
| H  | -2.9429853 | 1.6992574  | 0.0000000  |
| H  | -2.9203993 | -0.1143362 | 1.7413555  |
| Pt | -2.7293677 | -0.0517249 | 0.0000000  |
| H  | -1.2465619 | 0.7189822  | 3.1647010  |
| H  | -1.2465619 | 0.7189822  | -3.1647010 |
| H  | -0.0000000 | -1.4401041 | 3.1647820  |
| Pt | 2.7293677  | -0.0517249 | 0.0000000  |
| H  | 2.9203993  | -0.1143363 | -1.7413555 |
| H  | 1.5570929  | -2.4728803 | -1.7415209 |
| Pt | 1.3352290  | -0.7716386 | -2.2441164 |
| H  | -0.0000000 | -1.4401041 | -3.1647820 |
| Pt | -1.4084988 | -2.3388279 | 0.0000000  |

|    |            |            |            |
|----|------------|------------|------------|
| H  | 3.0677405  | -1.7716279 | 0.0000000  |
| H  | -0.0000000 | -3.3986371 | 0.0000000  |
| H  | -1.5570928 | -2.4728803 | -1.7415209 |
| Pt | 1.4084988  | -2.3388279 | 0.0000000  |
| H  | -1.5570928 | -2.4728803 | 1.7415209  |
| H  | 1.5570929  | -2.4728803 | 1.7415209  |
| Pt | 1.3352290  | -0.7716386 | 2.2441164  |
| H  | 2.9203993  | -0.1143363 | 1.7413555  |
| Pt | -1.3352290 | -0.7716386 | 2.2441164  |
| Pt | -1.3352290 | -0.7716386 | -2.2441164 |
| H  | -3.0677405 | -1.7716279 | 0.0000000  |

Isomer 4 (bare Pt<sub>12</sub><sup>-</sup>):(method: TPSS/def2-TZVP)

Energy= -1432.5612

|    |            |            |            |
|----|------------|------------|------------|
| Pt | -0.0328040 | -0.0000472 | 3.0249376  |
| Pt | 0.0077873  | -2.1347910 | 1.5287267  |
| Pt | 0.0077107  | 2.1344719  | 1.5284569  |
| Pt | 1.3842984  | -0.0000761 | 0.7562247  |
| Pt | 1.3889689  | -2.1959953 | -0.7979263 |
| Pt | -1.3165963 | -2.1351698 | -0.7682103 |
| Pt | 2.6697742  | 0.0000421  | -1.5395890 |
| Pt | -1.5903852 | 0.0001201  | 0.9182144  |
| Pt | 1.3888581  | 2.1958107  | -0.7977578 |
| Pt | -1.3165153 | 2.1349302  | -0.7682978 |
| Pt | 0.0407512  | 0.0000241  | -1.5712640 |
| Pt | -2.6316040 | -0.0000927 | -1.4858558 |

Isomers generated using isomer 1 core:

Isomer 1-1:(method: TPSS/def2-TZVP)

Energy = -1447.228224995

|    |            |            |            |
|----|------------|------------|------------|
| Pt | 1.4744186  | -1.5143661 | 1.7267028  |
| Pt | -1.2442052 | -1.3446398 | 1.9323312  |
| H  | -2.7705537 | -0.4901583 | 1.8611540  |
| H  | -1.8805029 | -2.6479787 | 0.9216466  |
| H  | 1.5805941  | -0.4357495 | 3.1307923  |
| Pt | 0.3244598  | 0.7308624  | 2.7083958  |
| H  | -0.9258425 | -0.3158848 | 3.3208874  |
| H  | 3.0672911  | -0.9106160 | 1.2920975  |
| Pt | 2.7166256  | 0.0183525  | -0.1747462 |
| H  | 3.1217499  | 1.4514804  | 0.7735442  |
| Pt | 1.5699738  | 2.2831660  | 0.8487114  |
| H  | 1.6112461  | 1.9329079  | 2.5749462  |
| Pt | -2.6562297 | 0.3131697  | 0.3007585  |
| H  | -3.0678382 | 1.2299239  | -1.1520021 |
| H  | -2.2820092 | -3.3723786 | -1.2366475 |
| H  | -0.9351218 | 1.9445850  | 2.7150460  |
| Pt | -1.0785718 | 2.2759886  | 0.9923830  |
| H  | 0.2567625  | 3.4502224  | 1.0924452  |
| Pt | 1.0877472  | -2.0237071 | -0.8948484 |
| H  | 1.6002944  | -2.8319538 | 0.5995790  |
| H  | -0.2093836 | -3.0831557 | -0.8312848 |
| H  | 2.7523471  | -1.3895846 | -1.1660203 |
| H  | 1.7683046  | 2.9648273  | -0.7666892 |

|    |            |            |            |
|----|------------|------------|------------|
| Pt | -1.7173709 | -2.0132338 | -0.7176462 |
| H  | -3.2524093 | -1.4630937 | -0.6524228 |
| H  | -1.7111912 | -1.6032801 | -2.4181209 |
| H  | 0.1088412  | -2.3971120 | 2.3873572  |
| Pt | -0.3528312 | -0.4596738 | -2.5732259 |
| H  | 2.8262679  | 0.8878032  | -1.6819715 |
| H  | 0.9297499  | 0.5758249  | -3.1528978 |
| H  | 0.8312019  | -1.7567509 | -2.6100576 |
| H  | -1.6281911 | 3.1260041  | -0.4697523 |
| Pt | -1.4815995 | 1.8211074  | -1.6072604 |
| Pt | 1.2242747  | 1.6307384  | -1.7797158 |
| H  | -0.0970247 | 2.6783880  | -2.2803463 |
| H  | -1.5612738 | 0.7379652  | -3.0131223 |

Isomer 1-2:(method: TPSS/def2-TZVP)

Energy = -1447.220861396

|    |            |            |            |
|----|------------|------------|------------|
| Pt | 1.4404043  | -1.7100341 | 1.7438668  |
| Pt | -1.2745595 | -1.6027887 | 1.9815092  |
| H  | -2.7529779 | -0.7475113 | 1.8781766  |
| H  | -1.8109569 | -2.9063146 | 0.9035964  |
| H  | 1.4904533  | -0.6134763 | 3.1163583  |
| Pt | 0.2148014  | 0.5409742  | 2.7398241  |
| H  | -0.9953429 | -0.5713719 | 3.3683020  |
| H  | 3.0240978  | -1.0724756 | 1.3242938  |
| Pt | 2.6832902  | -0.1742160 | -0.1416475 |
| H  | 3.0651307  | 1.2208318  | 0.7768134  |
| Pt | 1.4502538  | 2.0532768  | 0.8415887  |

|    |            |            |            |
|----|------------|------------|------------|
| H  | 1.4788844  | 1.7344556  | 2.5803706  |
| Pt | -2.5320146 | 0.1310406  | 0.3349823  |
| H  | -3.0180227 | 1.0673981  | -1.0410011 |
| H  | -2.2143294 | 2.6836429  | -2.4305411 |
| H  | -1.0422715 | 1.7645242  | 2.8362884  |
| Pt | -1.2209596 | 2.2852216  | 1.1721467  |
| H  | 0.4479402  | 3.3361894  | 1.1268227  |
| Pt | 1.0999131  | -2.2588903 | -0.9019367 |
| H  | 1.5957196  | -3.0318700 | 0.6134189  |
| H  | -0.3114241 | -3.3531693 | -0.9247631 |
| H  | 2.6995190  | -1.6706127 | -1.1399535 |
| H  | 1.7518472  | 2.7943222  | -0.7342657 |
| Pt | -1.5999991 | -2.2018619 | -0.6823346 |
| H  | -3.1274510 | -1.2705143 | -0.5254534 |
| H  | -1.6366166 | -1.7800871 | -2.3862630 |
| H  | 0.1113862  | -2.6269672 | 2.4184572  |
| Pt | -0.3253099 | -0.6117599 | -2.5410164 |
| H  | 2.8277458  | 0.6928400  | -1.6569285 |
| H  | 0.9619953  | 0.4222566  | -3.1709015 |
| H  | 0.8675563  | -1.9038281 | -2.5900402 |
| H  | -1.5992994 | 3.0320842  | -0.3703399 |
| Pt | -1.4359910 | 1.7091160  | -1.5296079 |
| Pt | 1.2870614  | 1.5027092  | -1.8283304 |
| H  | -0.0660913 | 2.5488589  | -2.2531893 |
| H  | -1.5343825 | 0.5880073  | -2.9083021 |

Isomer 1-3:(method: TPSS/def2-TZVP)



Energy = -1447.218998125

|    |            |            |            |
|----|------------|------------|------------|
| Pt | 1.3226429  | -1.5278897 | 1.6085498  |
| Pt | -1.4205292 | -1.4002035 | 1.8895426  |
| H  | -2.9678353 | -0.5856970 | 1.7333840  |
| H  | -1.9201916 | -2.7030094 | 0.8226044  |
| H  | 1.3821267  | -0.4332983 | 2.9953742  |
| Pt | 0.1243645  | 0.7350792  | 2.6428899  |
| H  | -1.1293904 | -0.3350739 | 3.2622667  |
| H  | 2.9192145  | -0.8884193 | 1.1604791  |
| Pt | 2.6057310  | -0.0125747 | -0.3117930 |
| H  | 2.9701839  | 1.4203210  | 0.6164960  |
| Pt | 1.3771587  | 2.2127220  | 0.7175781  |
| H  | 1.4208183  | 1.9035705  | 2.4489762  |
| Pt | -2.8156125 | 0.2266146  | 0.1981683  |
| H  | -3.1941365 | 1.1533727  | -1.2504847 |
| H  | 2.1535753  | -2.4499738 | 2.5138384  |
| H  | -1.1073335 | 1.9879927  | 2.6446322  |
| Pt | -1.2861328 | 2.3504194  | 0.9486908  |
| H  | 0.1745170  | 3.4239577  | 0.9661476  |
| Pt | 1.0527094  | -2.1536044 | -1.0679381 |
| H  | 1.4775019  | -2.8729273 | 0.4600760  |
| H  | -0.3627057 | -3.1770765 | -1.0080564 |
| H  | 2.6586578  | -1.4714959 | -1.2986102 |
| H  | 1.6030729  | 2.9385862  | -0.8736362 |
| Pt | -1.6682865 | -1.9910566 | -0.7660910 |
| H  | -3.2449345 | -1.2825549 | -0.6969938 |
| H  | -1.7323691 | -1.6556079 | -2.4952786 |

|    |            |            |            |
|----|------------|------------|------------|
| H  | -0.0446936 | -2.4073166 | 2.2998092  |
| Pt | -0.4292026 | -0.4971866 | -2.6753449 |
| H  | 2.6846283  | 0.8712234  | -1.8283556 |
| H  | 0.8191649  | 0.5704508  | -3.3021233 |
| H  | 0.7779215  | -1.7582828 | -2.7581596 |
| H  | -1.7772838 | 3.1035811  | -0.5649817 |
| Pt | -1.6048367 | 1.7595511  | -1.6771829 |
| Pt | 1.1129082  | 1.6272312  | -1.9274283 |
| H  | -0.2513184 | 2.6432909  | -2.3678595 |
| H  | -1.6801047 | 0.6752845  | -3.0591862 |

Isomers generated using isomer 2 core:

Isomer 2-1:(method: TPSS/def2-TZVP)

Energy = -1447.234196247

|    |            |            |            |
|----|------------|------------|------------|
| Pt | 0.1581452  | -0.0498831 | 0.2252664  |
| Pt | -1.2672272 | -1.1679421 | 2.2376765  |
| H  | -2.0600088 | -1.8414627 | 3.4302226  |
| H  | -1.8923421 | -2.5182232 | 1.3284937  |
| H  | 1.4287330  | -0.2196993 | 3.5153112  |
| Pt | 0.4662872  | 0.8352392  | 2.8385940  |
| H  | -0.8462796 | -0.0984933 | 3.5522676  |
| H  | 3.4232347  | -1.2743243 | 1.2320605  |
| Pt | 2.9233900  | -0.4484085 | -0.0081620 |
| H  | 3.4095250  | 0.9922137  | 0.8594999  |
| Pt | 1.9461198  | 2.0068076  | 0.8217012  |
| H  | 1.8988773  | 1.8066198  | 2.5885405  |

|    |            |            |            |
|----|------------|------------|------------|
| Pt | -2.5316249 | 0.4423504  | 0.3597952  |
| H  | -4.0849967 | 0.7568636  | 0.4280535  |
| H  | -2.4888544 | 2.0378123  | 1.0920005  |
| H  | -0.6928857 | 2.3052115  | 2.5816260  |
| Pt | -0.7976557 | 2.5079668  | 0.9262012  |
| H  | 0.7694435  | 3.3183131  | 0.9180398  |
| Pt | 1.1627779  | -2.4202021 | -0.6736262 |
| H  | -0.3381175 | -3.3045306 | -0.5535556 |
| H  | 1.7052825  | -3.7410064 | -1.3525153 |
| H  | 2.8566375  | -1.9882927 | -0.8507120 |
| H  | 2.2847744  | 2.5344235  | -0.8250742 |
| Pt | -1.5888316 | -2.0677117 | -0.3606844 |
| H  | -2.5908238 | -3.2500722 | -0.6996339 |
| H  | -1.5222140 | -1.8225266 | -2.1206004 |
| H  | -3.0654454 | -1.0532050 | -0.3263383 |
| Pt | -0.1371299 | -0.8029571 | -2.3844477 |
| H  | 3.1315370  | 0.5174223  | -1.7325167 |
| H  | 1.2841866  | 0.0657613  | -3.0558600 |
| H  | -0.2086882 | -1.3452537 | -3.8729666 |
| H  | -1.1003406 | 3.1279938  | -0.7704338 |
| Pt | -1.0110575 | 1.7006119  | -1.6896243 |
| Pt | 1.6548276  | 1.2122090  | -1.8110632 |
| H  | -1.1399397 | 2.7464360  | -2.8515620 |
| H  | -1.1393161 | 0.4999388  | -2.9959739 |

Isomer 2-2:(method: TPSS/def2-TZVP)

Energy = -1447.219948295

|    |            |            |            |
|----|------------|------------|------------|
| Pt | 0.0467254  | -0.0172697 | 0.2184013  |
| Pt | -1.3676380 | -1.1436132 | 2.2877278  |
| H  | -2.2368181 | -1.7412491 | 3.4635680  |
| H  | -2.0535020 | -2.4424414 | 1.3512013  |
| H  | 1.3982565  | -0.0613131 | 3.4742015  |
| Pt | 0.3635860  | 0.9655657  | 2.8565845  |
| H  | -0.8574101 | -0.0786703 | 3.5889174  |
| H  | 3.1222947  | -1.1283854 | 1.1852554  |
| Pt | 2.7833649  | -0.3258819 | -0.1357058 |
| H  | 3.2253091  | 1.1110623  | 0.7364590  |
| Pt | 1.7458914  | 2.1278232  | 0.7331833  |
| H  | 1.7510726  | 1.9448278  | 2.5213427  |
| Pt | -2.6290038 | 0.4768310  | 0.3075273  |
| H  | 0.2465989  | -1.2819004 | 1.2782165  |
| H  | -2.6640913 | 2.0668516  | 1.1059031  |
| H  | -0.8759194 | 2.3624622  | 2.6008298  |
| Pt | -1.0077653 | 2.5576161  | 0.9392606  |
| H  | 0.5525534  | 3.4040683  | 0.8805363  |
| Pt | 1.0713380  | -2.3788264 | -0.7531782 |
| H  | -0.4374886 | -3.2672994 | -0.5360540 |
| H  | 1.5850691  | -3.6421889 | -1.5330129 |
| H  | 2.7352109  | -1.8853995 | -0.9690666 |
| H  | 2.0269214  | 2.6518558  | -0.9106021 |
| Pt | -1.7156637 | -2.0532990 | -0.3639500 |
| H  | -2.7314045 | -3.2189231 | -0.6845151 |
| H  | -1.6430203 | -1.8207627 | -2.1282478 |
| H  | -3.1564367 | -1.0013627 | -0.4436661 |

|    |            |            |            |
|----|------------|------------|------------|
| Pt | -0.3107035 | -0.7697614 | -2.4240655 |
| H  | 2.9278509  | 0.5840161  | -1.8230229 |
| H  | 1.0857770  | 0.1521318  | -3.1420842 |
| H  | -0.4529923 | -1.2671948 | -3.9125418 |
| H  | -1.3759868 | 3.1624122  | -0.7171381 |
| Pt | -1.2484588 | 1.7103338  | -1.6388298 |
| Pt | 1.4467417  | 1.3267332  | -1.9437605 |
| H  | 0.0261186  | 2.4103736  | -2.5277360 |
| H  | -1.3763772 | 0.5107778  | -2.9419384 |

Isomer 2-3:(method: TPSS/def2-TZVP)

Energy = -1447.221952128

|    |            |            |           |
|----|------------|------------|-----------|
| Pt | 0.0946018  | 0.0453108  | 0.0781824 |
| Pt | -1.3138831 | -1.1907528 | 2.0537343 |
| H  | -2.0042143 | -1.9662195 | 3.2582954 |
| H  | -2.0807561 | -2.4272064 | 1.0906745 |
| H  | 1.4575154  | -0.2863543 | 3.1526152 |
| Pt | 0.4393039  | 0.8190117  | 2.6749882 |
| H  | -0.7842153 | -0.2244027 | 3.4071990 |
| H  | 4.3005040  | -0.8209835 | 0.3732418 |
| Pt | 2.7613347  | -0.4731907 | 0.1899980 |
| H  | 3.3305849  | 1.0658665  | 0.7924030 |
| Pt | 1.8893557  | 2.0917408  | 0.7307098 |
| H  | 1.8165257  | 1.8940060  | 2.4819708 |
| Pt | -2.6361756 | 0.5995758  | 0.1663555 |
| H  | -2.6969384 | -0.1381294 | 1.6843098 |
| H  | -2.5594854 | 2.1911369  | 0.9383045 |

|    |            |            |            |
|----|------------|------------|------------|
| H  | -0.7655835 | 2.2677088  | 2.4844289  |
| Pt | -0.8570712 | 2.5865263  | 0.8212334  |
| H  | 0.7030196  | 3.4061976  | 0.8150016  |
| Pt | 0.9973331  | -2.4452785 | -0.4349674 |
| H  | -0.5381266 | -3.2665775 | -0.5548900 |
| H  | 1.5440087  | -3.9264530 | -0.5275665 |
| H  | 2.7135940  | -2.1635763 | -0.2659757 |
| H  | 2.2475534  | 2.5777125  | -0.9199172 |
| Pt | -1.7122766 | -1.9401439 | -0.5772337 |
| H  | -2.7694144 | -3.0499521 | -0.9809438 |
| H  | -1.5709088 | -1.7572441 | -2.3147206 |
| H  | -3.1270882 | -0.8865040 | -0.6429599 |
| Pt | -0.1565039 | -0.7072265 | -2.5807115 |
| H  | 2.8901730  | 0.2190739  | -1.4256665 |
| H  | 1.2313875  | 0.1550528  | -3.2309086 |
| H  | 0.8375223  | -2.0016843 | -2.2892781 |
| H  | -1.0822597 | 3.2383979  | -0.8009113 |
| Pt | -1.1153179 | 1.7924283  | -1.8141542 |
| Pt | 1.6288103  | 1.2508242  | -1.9015927 |
| H  | -1.8013784 | 2.7559439  | -2.8405315 |
| H  | -1.3115308 | 0.7153649  | -3.0907166 |

Isomer 2.4:(method: TPSS/def2-TZVP)

Energy = -1447.213798196

|    |            |            |           |
|----|------------|------------|-----------|
| Pt | 0.0677555  | -0.2148994 | 0.3442317 |
| Pt | -1.5615410 | -1.1383660 | 2.3675780 |
| H  | -3.0638255 | -0.4168828 | 2.0942840 |

|    |            |            |            |
|----|------------|------------|------------|
| H  | 1.4021633  | -1.1260058 | 0.7544476  |
| H  | 1.1955451  | -0.3091332 | 3.6270675  |
| Pt | 0.2840847  | 0.7925541  | 2.9388571  |
| H  | -1.1019536 | -0.0148066 | 3.6575071  |
| H  | 3.6627001  | -1.2992727 | 1.0676291  |
| Pt | 2.9585743  | -0.5287848 | -0.1264374 |
| H  | 3.3390702  | 0.9197394  | 0.7663241  |
| Pt | 1.7927988  | 1.8743195  | 0.8065543  |
| H  | 1.7852782  | 1.6321299  | 2.5759408  |
| Pt | -2.7594530 | 0.3294605  | 0.4143162  |
| H  | -2.9900069 | 1.1149409  | -1.1045913 |
| H  | -2.6573934 | 1.9307301  | 1.2049387  |
| H  | -0.8186747 | 2.2806178  | 2.6450691  |
| Pt | -0.9778010 | 2.3638534  | 0.9853884  |
| H  | 0.6067627  | 3.1534024  | 0.9241221  |
| Pt | 1.0994016  | -2.5426888 | -0.7119559 |
| H  | -0.4317426 | -3.3632039 | -0.3920591 |
| H  | 1.4696700  | -3.8198878 | -1.5630410 |
| H  | 2.7803061  | -2.0856229 | -0.9902538 |
| H  | 2.0853388  | 2.4167770  | -0.8435386 |
| Pt | -1.7212646 | -2.1691957 | -0.2418808 |
| H  | -2.0758312 | -2.5448158 | 1.4404936  |
| H  | -1.6596989 | -2.0229249 | -2.0104808 |
| H  | -3.2228535 | -1.1914373 | -0.2974977 |
| Pt | -0.3281556 | -0.9525649 | -2.3000464 |
| H  | 2.8899983  | 0.3521340  | -1.7941321 |
| H  | 1.0268159  | -0.0462084 | -3.0641126 |

|    |            |            |            |
|----|------------|------------|------------|
| H  | -0.4741169 | -1.5304290 | -3.7730273 |
| H  | -1.3740899 | 2.9840878  | -0.6996026 |
| Pt | -1.3029842 | 1.5414097  | -1.6047581 |
| Pt | 1.4184546  | 1.1202545  | -1.8445135 |
| H  | 0.0642929  | 2.2354452  | -2.3771864 |
| H  | -1.4076249 | 0.2752742  | -2.8756340 |

Isomer 2-5:(method: TPSS/def2-TZVP)

Energy = -1447.220073052

|    |            |            |            |
|----|------------|------------|------------|
| Pt | 0.1853880  | -0.1761830 | 0.2694418  |
| Pt | -1.3888558 | -1.1728288 | 2.2475752  |
| H  | -2.4758306 | -1.6204663 | 3.2976014  |
| H  | -1.9662771 | -2.5419566 | 1.3096644  |
| H  | 1.3664595  | -0.3063996 | 3.5378502  |
| Pt | 0.4249926  | 0.7836432  | 2.8719273  |
| H  | -0.9297121 | -0.1003828 | 3.5631414  |
| H  | 3.3256943  | -1.3405932 | 1.1187766  |
| Pt | 2.9252619  | -0.5140833 | -0.1703719 |
| H  | 3.3600027  | 0.8886356  | 0.7563435  |
| Pt | 1.8952055  | 1.9318502  | 0.7840405  |
| H  | 1.8869414  | 1.6714117  | 2.5594930  |
| Pt | -2.5084133 | 0.3552038  | 0.3366069  |
| H  | -2.8406376 | 1.2139036  | -1.1186700 |
| H  | -2.4790726 | 1.9580711  | 1.1867822  |
| H  | -0.6999116 | 2.2678597  | 2.6188825  |
| Pt | -0.8416854 | 2.4403078  | 0.9665900  |
| H  | 0.7318648  | 3.2490028  | 0.9227614  |



|    |            |            |            |
|----|------------|------------|------------|
| Pt | 1.2090173  | -2.6114583 | -0.8285777 |
| H  | -0.3447942 | -3.4371885 | -0.6103926 |
| H  | 0.8212672  | -1.7300501 | 0.6097422  |
| H  | 2.8746845  | -2.0458602 | -1.0525529 |
| H  | 2.2012562  | 2.4926426  | -0.8502719 |
| Pt | -1.5794083 | -2.1891514 | -0.3821554 |
| H  | -2.6084884 | -3.3517475 | -0.7178394 |
| H  | -1.4887618 | -1.9538025 | -2.1486481 |
| H  | -3.0131224 | -1.1274020 | -0.4001877 |
| Pt | -0.1677534 | -0.8693951 | -2.3692885 |
| H  | 3.0302880  | 0.4331746  | -1.8191592 |
| H  | 1.1868017  | 0.0557686  | -3.1148004 |
| H  | -0.2272221 | -1.4225295 | -3.8551309 |
| H  | -1.2258969 | 3.1170263  | -0.6753105 |
| Pt | -1.1518220 | 1.6692206  | -1.6431234 |
| Pt | 1.5615973  | 1.2127436  | -1.8914477 |
| H  | 0.1971535  | 2.3493901  | -2.4170645 |
| H  | -1.2462107 | 0.4216229  | -2.8922277 |

Isomer 2.6:(method: TPSS/def2-TZVP)

Energy = -1447.242032648

|    |            |            |           |
|----|------------|------------|-----------|
| Pt | 0.1878900  | -0.1302391 | 0.2939932 |
| Pt | -1.3057896 | -1.1240102 | 2.3270471 |
| H  | -2.3369556 | -1.5798069 | 3.4355527 |
| H  | -1.9043019 | -2.5123395 | 1.4436460 |
| H  | 1.4400655  | -0.1908425 | 3.5357113 |
| Pt | 0.4648153  | 0.8764716  | 2.8881617 |

|    |            |            |            |
|----|------------|------------|------------|
| H  | -0.8533135 | -0.0325480 | 3.6201409  |
| H  | 3.2233122  | -1.2217924 | 1.2182411  |
| Pt | 2.8684889  | -0.4138737 | -0.0908050 |
| H  | 3.3428474  | 1.0173946  | 0.7747356  |
| Pt | 1.8611827  | 2.0301707  | 0.7798269  |
| H  | 1.8920153  | 1.8146136  | 2.5644065  |
| Pt | -2.5046925 | 0.3672855  | 0.4269250  |
| H  | -2.8906653 | 1.2131471  | -1.0263960 |
| H  | -2.4965224 | 1.9689278  | 1.2630372  |
| H  | -0.7002521 | 2.3476455  | 2.6437232  |
| Pt | -0.8752450 | 2.4785020  | 0.9941670  |
| H  | 0.6834551  | 3.3228582  | 0.9104118  |
| Pt | 1.1657775  | -2.4533583 | -0.7014852 |
| H  | -0.3236836 | -3.3644834 | -0.4551471 |
| H  | 1.6869267  | -3.7409407 | -1.4581241 |
| H  | 2.8178787  | -1.9683787 | -0.9510306 |
| H  | 2.1370526  | 2.5659080  | -0.8664296 |
| Pt | -1.5729108 | -2.1448321 | -0.2523640 |
| H  | -2.6040842 | -3.3176134 | -0.5568416 |
| H  | -1.5468535 | -1.9234848 | -2.0267675 |
| H  | -3.0423478 | -1.1301716 | -0.2610594 |
| Pt | -0.2479293 | -0.8324162 | -2.3235960 |
| H  | 2.9651443  | 0.4950542  | -1.7846782 |
| H  | 1.1103668  | 0.0959147  | -3.0822866 |
| H  | -0.3788964 | -1.3593395 | -3.8140314 |
| H  | -1.3117967 | 3.1198103  | -0.6908970 |
| Pt | -1.2199877 | 1.6834966  | -1.6088138 |

|    |            |           |            |
|----|------------|-----------|------------|
| Pt | 1.4916667  | 1.2590885 | -1.8732867 |
| H  | 0.0991159  | 2.3760996 | -2.4179602 |
| H  | -1.3217737 | 0.4080824 | -2.8777273 |

Isomer 2-7:(method: TPSS/def2-TZVP)

Energy = -1447.222106741

|    |            |            |            |
|----|------------|------------|------------|
| Pt | 0.1490334  | -0.1568781 | 0.2111583  |
| Pt | -1.2328957 | -1.3062183 | 2.2435786  |
| H  | -2.6831614 | -0.4231415 | 1.8872050  |
| H  | -1.9074576 | -2.0533032 | 3.4849534  |
| H  | 1.5033496  | -0.2395809 | 3.4536422  |
| Pt | 0.4950481  | 0.7778810  | 2.7889928  |
| H  | -0.7371316 | -0.2154150 | 3.5321948  |
| H  | 3.1923083  | -1.2451461 | 1.2245128  |
| Pt | 2.8383219  | -0.4690686 | -0.1057159 |
| H  | 3.3527015  | 0.9906789  | 0.7245864  |
| Pt | 1.8800793  | 2.0028320  | 0.7209838  |
| H  | 1.8943148  | 1.8076908  | 2.4798464  |
| Pt | -2.5760955 | 0.3100539  | 0.3189686  |
| H  | -2.8653933 | 1.2201201  | -1.2378786 |
| H  | -2.5005924 | 1.8908037  | 1.1651128  |
| H  | -0.6848100 | 2.2464401  | 2.5376114  |
| Pt | -0.8700589 | 2.3897601  | 0.8964240  |
| H  | 0.6956683  | 3.2792780  | 0.8211298  |
| Pt | 1.0900329  | -2.4997524 | -0.7202750 |
| H  | -0.3873738 | -3.4458948 | -0.5870472 |
| H  | 1.6199730  | -3.8138163 | -1.4394889 |

|    |            |            |            |
|----|------------|------------|------------|
| H  | 2.7672166  | -2.0361596 | -0.9186678 |
| H  | 2.1714132  | 2.5241517  | -0.9225310 |
| Pt | -1.6369404 | -2.2176151 | -0.3759934 |
| H  | -1.8596225 | -2.6735221 | 1.3376934  |
| H  | -1.6205132 | -1.9894385 | -2.1261406 |
| H  | -3.0951521 | -1.2152398 | -0.3697679 |
| Pt | -0.2917184 | -0.8909864 | -2.3810444 |
| H  | 2.9207642  | 0.3511917  | -1.7977353 |
| H  | 1.0680752  | 0.0163818  | -3.1022590 |
| H  | -0.4040476 | -1.4462632 | -3.8692253 |
| H  | -1.3611091 | 3.0551234  | -0.8014652 |
| Pt | -1.2482377 | 1.6400776  | -1.7237766 |
| Pt | 1.4792071  | 1.1994671  | -1.9106985 |
| H  | 0.1779539  | 2.3237047  | -2.4394181 |
| H  | -1.3331502 | 0.3118034  | -2.9994659 |

Isomer 2-8:(method: TPSS/def2-TZVP)

Energy = -1447.211860525

|    |            |            |            |
|----|------------|------------|------------|
| Pt | 0.1778195  | 0.0316429  | 0.0922890  |
| Pt | -1.2946901 | -1.1172392 | 2.0718200  |
| H  | -2.0818704 | -1.8120542 | 3.2686084  |
| H  | -1.9570198 | -2.4240976 | 1.1047001  |
| H  | 1.4124429  | -0.1831459 | 3.2536555  |
| Pt | 0.4507925  | 0.9071206  | 2.6484736  |
| H  | -0.8405712 | -0.0721498 | 3.3842978  |
| H  | 3.3485179  | -1.1672731 | 1.2645675  |
| Pt | 2.9660513  | -0.4140593 | -0.0591625 |

|    |            |            |            |
|----|------------|------------|------------|
| H  | 3.4541087  | 1.0549730  | 0.7509143  |
| Pt | 1.9900878  | 2.0676789  | 0.6790106  |
| H  | 1.8894610  | 1.8794028  | 2.4523020  |
| Pt | -2.4837977 | 0.6522578  | 0.0166037  |
| H  | -2.6509389 | -0.0658789 | 1.5344716  |
| H  | -2.4393035 | 2.2600758  | 0.7179121  |
| H  | -0.7163733 | 2.3712690  | 2.3228896  |
| Pt | -0.7236265 | 2.6348897  | 0.6552284  |
| H  | 0.8576774  | 3.4098159  | 0.7330803  |
| Pt | 1.1682570  | -2.3562732 | -0.7013189 |
| H  | -0.3981073 | -3.1910367 | -0.6263894 |
| H  | 1.7555691  | -3.7919938 | -1.0585609 |
| H  | 2.8930215  | -2.0208654 | -0.7587469 |
| H  | 2.3334128  | 2.5547189  | -0.9578808 |
| Pt | -1.6065853 | -1.9290072 | -0.5619656 |
| H  | -2.6326056 | -3.0777279 | -0.9536795 |
| H  | -1.5785487 | -1.6638047 | -2.3135156 |
| H  | -3.0503728 | -0.8448292 | -0.6333022 |
| Pt | -0.1726003 | -0.6458348 | -2.5932780 |
| H  | 3.1331257  | 0.5088864  | -1.8288985 |
| H  | 1.2791746  | 0.1661158  | -3.2399814 |
| H  | 0.8322966  | -2.0322050 | -2.3973017 |
| H  | -0.8910899 | 3.3363490  | -0.9932488 |
| Pt | -0.9399022 | 1.9266583  | -2.0012145 |
| Pt | 1.6501466  | 1.2240346  | -1.9187482 |
| H  | -4.0200285 | 1.0419208  | -0.0636363 |
| H  | -1.1139310 | 0.7816657  | -3.2899947 |

Isomer 2-9:(method: TPSS/def2-TZVP)

Energy = -1447.214862439

|    |            |            |            |
|----|------------|------------|------------|
| Pt | 0.1689597  | -0.2351301 | 0.3583965  |
| Pt | -1.4730093 | -1.1513128 | 2.2663667  |
| H  | -2.5759948 | -1.5991583 | 3.3126733  |
| H  | -1.9825431 | -2.5519305 | 1.3198056  |
| H  | 1.2539402  | -0.2942564 | 3.4653891  |
| Pt | 0.3378019  | 0.8321037  | 2.8345922  |
| H  | -1.0744785 | -0.0191722 | 3.5280808  |
| H  | 3.8656006  | -1.2793088 | 0.8428596  |
| Pt | 3.0374528  | -0.4922589 | -0.2575448 |
| H  | 3.3881002  | 0.9452949  | 0.6714719  |
| Pt | 1.8562888  | 1.9113871  | 0.7168456  |
| H  | 1.8258239  | 1.6849554  | 2.5063380  |
| Pt | -2.6066188 | 0.3720291  | 0.3411810  |
| H  | -2.9951905 | 1.1624067  | -1.0937077 |
| H  | -2.5517981 | 2.0074526  | 1.1438264  |
| H  | -0.7569871 | 2.3657587  | 2.5628678  |
| Pt | -0.8990037 | 2.4286659  | 0.9023730  |
| H  | 0.6784858  | 3.2138191  | 0.8344834  |
| Pt | 1.2286797  | -2.4574580 | -0.8994071 |
| H  | -0.3082722 | -3.2831453 | -0.5316391 |
| H  | 1.5005967  | -1.1096579 | 0.7641488  |
| H  | 2.9632504  | -1.9938288 | -1.1548633 |
| H  | 2.1251681  | 2.4357644  | -0.9244313 |
| Pt | -1.6134449 | -2.1379344 | -0.3538916 |

|    |            |            |            |
|----|------------|------------|------------|
| H  | -2.6162555 | -3.3219324 | -0.7203184 |
| H  | -1.6452966 | -1.9333907 | -2.1328543 |
| H  | -3.1064905 | -1.1066384 | -0.3579400 |
| Pt | -0.3113549 | -0.8796682 | -2.4713454 |
| H  | 2.9415424  | 0.4320602  | -1.9020583 |
| H  | 1.0325503  | 0.0543542  | -3.2115266 |
| H  | 0.7895823  | -2.3815248 | -2.5221139 |
| H  | -1.2859819 | 3.0365950  | -0.7719069 |
| Pt | -1.2430737 | 1.5727905  | -1.6693301 |
| Pt | 1.4443905  | 1.1414005  | -1.9216099 |
| H  | 0.0324512  | 2.2762861  | -2.4982144 |
| H  | -1.4248713 | 0.3545826  | -2.9769965 |

Isomer 2-10:(method: TPSS/def2-TZVP)

Energy = -1447.227162993

|    |            |            |            |
|----|------------|------------|------------|
| Pt | 0.1378493  | -0.1560160 | 0.2475425  |
| Pt | -1.2567001 | -1.2813888 | 2.2478006  |
| H  | -2.8132057 | -0.2456260 | 1.8982337  |
| H  | -0.1352331 | -2.2367750 | 2.8044422  |
| H  | 1.4747219  | -0.0453729 | 3.5305137  |
| Pt | 0.4274609  | 0.9159556  | 2.8340554  |
| H  | -0.7838765 | -0.1468410 | 3.5233468  |
| H  | 3.0808409  | -1.2480325 | 1.3275378  |
| Pt | 2.8003801  | -0.4736616 | -0.0198478 |
| H  | 3.2336607  | 1.0056941  | 0.8195890  |
| Pt | 1.8108749  | 2.0583876  | 0.7353100  |
| H  | 1.7794119  | 1.9556639  | 2.5454894  |

|    |            |            |            |
|----|------------|------------|------------|
| Pt | -2.6216387 | 0.3212020  | 0.3312279  |
| H  | -2.8809219 | 1.0592312  | -1.2984809 |
| H  | -2.5943734 | 1.9321987  | 1.0798452  |
| H  | -0.8346021 | 2.2746903  | 2.5052075  |
| Pt | -0.9511102 | 2.4353034  | 0.8469056  |
| H  | 0.5870968  | 3.3183717  | 0.7764667  |
| Pt | 1.0736809  | -2.5275353 | -0.6919346 |
| H  | -0.4117007 | -3.4502530 | -0.5683168 |
| H  | 1.6015477  | -3.8128014 | -1.4417198 |
| H  | 2.7413600  | -2.0354683 | -0.8405985 |
| H  | 2.0874383  | 2.4927892  | -0.9251397 |
| Pt | -1.6756071 | -2.2438784 | -0.3401351 |
| H  | -1.8337883 | -2.6775277 | 1.3682167  |
| H  | -1.6831167 | -2.0196058 | -2.0782767 |
| H  | -3.1401518 | -1.2230840 | -0.2896170 |
| Pt | -0.3158255 | -0.9519091 | -2.3598926 |
| H  | 2.9019573  | 0.3351568  | -1.7298891 |
| H  | 1.0669735  | -0.0637318 | -3.0694005 |
| H  | -0.4208090 | -1.5493033 | -3.8202940 |
| H  | -1.3415769 | 3.0182654  | -0.8271625 |
| Pt | -1.2875877 | 1.5706793  | -1.7647360 |
| Pt | 1.4448901  | 1.1383580  | -1.8824949 |
| H  | 0.1205525  | 2.2487696  | -2.4769174 |
| H  | -1.3888724 | 0.3080948  | -2.9968768 |



## References

- (S1) Wilson, A. J. C.; Prince, E. In *International tables of crystallography*; Dordrecht/Boston/London, Ed.; Kluwer Academic Publishers, 1999.
- (S2) *CRC Handbook of Chemistry and Physics*, 66th ed.; CRC Press: Boca Raton, FL, 1986.
- (S3) Schooss, D.; Blom, M. N.; Parks, J. H.; Issendorff, B. v.; Haberland, H.; Kappes, M. M. The Structures of  $\text{Ag}_{55}^+$  and  $\text{Ag}_{55}^-$ : Trapped Ion Electron Diffraction and Density Functional Theory. *Nano Lett.* **2005**, *5*, 1972–1977.
- (S4) TURBOMOLE V7.7 2022, a development of University of Karlsruhe and Forschungszentrum Karlsruhe GmbH, 1989-2007, TURBOMOLE GmbH, since 2007; available from <https://www.turbomole.org>.
- (S5) Balasubramani, S. G.; Chen, G. P.; Coriani, S.; Diedenhofen, M.; Frank, M. S.; Franzke, Y. J.; Furche, F.; Grotjahn, R.; Harding, M. E.; Hättig, C.; Hellweg, A.; Helmich-Paris, B.; Holzer, C.; Huniar, U.; Kaupp, M.; Marefat Khah, A.; Karbalaeei Khani, S.; Müller, T.; Mack, F.; Nguyen, B. D.; Parker, S. M.; Perlt, E.; Rapoport, D.; Reiter, K.; Roy, S.; Rückert, M.; Schmitz, G.; Sierka, M.; Tapavicza, E.; Tew, D. P.; van Wüllen, C.; Voora, V. K.; Weigend, F.; Wodyński, A.; Yu, J. M. TURBOMOLE: Modular program suite for ab initio quantum-chemical and condensed-matter simulations. *J. Chem. Phys.* **2020**, *152*.
- (S6) Eichkorn, K.; Treutler, O.; Öhm, H.; Häser, M.; Ahlrichs, R. Auxiliary Basis Sets to Approximate Coulomb Potentials. *Chem. Phys. Lett* **1995**, *240*, 283–290.
- (S7) Eichkorn, K.; Weigend, F.; Treutler, O.; Ahlrichs, R. Auxiliary Basis Sets for Main Row Atoms and Transition Metals and Their Use to Approximate Coulomb Potentials. *Theor. Chem. Acc.* **1997**, *97*, 119–124.

- (S8) Becke, A. D. Density-functional exchange-energy approximation with correct asymptotic behavior. *Phys. Rev. A* **1988**, *38*, 3098–3100.
- (S9) Perdew, J. P. Density-functional approximation for the correlation energy of the inhomogeneous electron gas. *Phys. Rev. B* **1986**, *33*, 8822–8824.
- (S10) Tao, J.; Perdew, J. P.; Staroverov, V. N.; Scuseria, G. E. Climbing the Density Functional Ladder: Nonempirical Meta-Generalized Gradient Approximation Designed for Molecules and Solids. *Phys. Rev. Lett.* **2003**, *91*, 146401.
- (S11) Weigend, F.; Ahlrichs, R. Balanced Basis Sets of Split Valence, Triple Zeta Valence and Quadruple Zeta Valence Quality for H to Rn: Design and Assessment of Accuracy. *Phys. Chem. Chem. Phys.* **2005**, *7*, 3297–3305.
- (S12) Andrae, D.; Häußermann, U.; Dolg, M.; Stoll, H.; Preuß, H. Energy-Adjusted ab initio Pseudopotentials for the Second and Third Row Transition Elements. *Theor. Chim. Acta* **1990**, *77*, 123–141.
- (S13) Johansson, M. P.; Lechtken, A.; Schooss, D.; Kappes, M. M.; Furche, F. *Phys. Rev. A* **2008**, *77*, 053202–7.
- (S14) Kelting, R.; Baldes, A.; Schwarz, U.; Rapps, T.; Schooss, D.; Weis, P.; Neiss, C.; Weigend, F.; Kappes, M. M. Structures of Small Bismuth Cluster Cations. *J. Chem. Phys.* **2012**, *136*, 154309–154319.
- (S15) Bumüller, D.; Yohannes, A. G.; Kohaut, S.; Kondov, I.; Kappes, M. M.; Fink, K.; Schooss, D. Structures of Small Platinum Cluster Anions  $\text{Pt}_n^-$ : Experiment and Theory. *J. Phys. Chem. A* **2022**, *126*, 3502–3510.
- (S16) Armbruster, M. K.; Weigend, F.; van Wüllen, C.; Klopper, W. Self-consistent treatment of spin-orbit interactions with efficient Hartree-Fock and density functional methods. *Phys. Chem. Chem. Phys.* **2008**, *10*, 1748–1756.

- (S17) Caldeweyher, E.; Ehlert, S.; Hansen, A.; Neugebauer, H.; Spicher, S.; Bannwarth, C.; Grimme, S. A generally applicable atomic-charge dependent London dispersion correction. *J. Chem. Phys.* **2019**, *150*, 154122.
- (S18) Jonsson, G. H. H. Improved tangent estimate in the nudged elastic band method for finding minimum energy paths and saddle points. *J. Chem. Phys.* **2000**, *113*, 9978–9985.
- (S19) Reed, A. E.; Weinstock, R. B.; Weinhold, F. Natural population analysis. *J. Chem. Phys.* **1985**, *83*, 735–746.
- (S20) Wiberg, K. B. Application of the pople-santry-segal CNDO method to the cyclopropylcarbiny and cyclobutyl cation and to bicyclobutane. *Tetrahedron* **1968**, *24*, 1083–1096.
- (S21) Schleyer, P. v. R.; Maerker, C.; Dransfeld, A.; Jiao, H.; van Eikema Hommes, N. J. R. Nucleus-Independent Chemical Shifts: A Simple and Efficient Aromaticity Probe. *J. Am. Chem. Soc.* **1996**, *118*, 6317–6318.
